# Supplementary material
Source: Springer Nature journal article supplement (https://www.springermedizin.de/resource/supplementary/12885_2011_2901_MOESM1_ESM.pdf/9462242)

MID2 ACGCTCGACA  
MID3 AGACGCACTC  
MID4 AGCACTGTAG  
MID5 ATCAGACACG

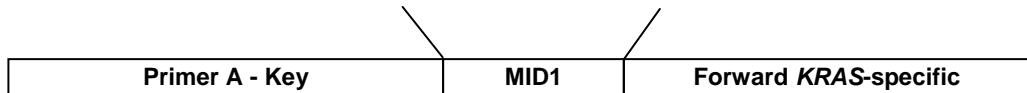

5' CGTATCGCCTCCCTCGCGCCATCAG [ACGAGTGCGT] ACACGTCTGCAGTCAACTGGAAT 3'

5' CTATGCGCCTTGCCAGCCCGCTCAG [ACGAGTGCGT] ATGGTCCTGCACCAGTAATATGCA 3'

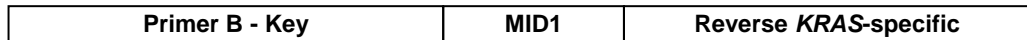

Supplement: MOESM1 [file 9462242]
